# Supplementary material for: A novel method for detecting uniparental disomy from trio genotypes identifies a significant excess in children with developmental disorders
Source: HighWire-hosted journal article supplement (doi:10.1101/gr.160465.113), 2013-12-19
Supplement: Supplemental_Figure_Legends.docx [file Supplemental_Figure_Legends.docx]

**SUPPLEMENTAL FIGURES**

1. Supplemental Figures 1-6
   1. Titles: WTCCC Figures 1-6
   2. Captions: Presumed UPD events in the WTCCC dataset. Yellow brackets denote long regions of homozygosity affecting the majority of the chromosome. Black dots above the ideograms denote homozygous genotypes; red dots denote heterozygous genotypes.
2. Supplemental Figure 7
   1. Title: Segmental UPD events
   2. Caption: Frequency of segmental UPD events from online UPD database ([Liehr 2013](#_ENREF_29)). The colour of each line segment displays the frequency of UPD segments among multiple samples
